# Supplementary material
Source: publisher site journal article supplement (https://www.dovepress.com/get_supplementary_file.php?f=370758.docx)
Supplement: Supplementary file 1 [file get_supplementary_file.php]

**SEMI-STRUCTURED QUESTIONS**

1. **Institution Description**
2. Name :
3. Ownership :
4. Bed Capacity :
5. Number of health workers :
6. Number of nurses :
7. COVID-19 recruitment : (volunteers %)
8. **Planning for nursing personnel**
9. How does your institution plan for human resources for health (HRH), especially nursing?
10. What method is used as a reference for planning (if any)? Please explain!
11. How does the decision-making process for nursing HR planning in your institution? Please explain!
12. How does your institution respond to the surge in Covid-19 cases in the context of procurement of HRH, especially nurses?
13. How is HRH planning at your institution during the Covid-19 pandemic?
14. **Nurse availability in labour markets**
15. How do you see the general availability of nurses in Indonesia?
16. What needs to be improved regarding the availability of nurses in Indonesia in your opinion as an employer?
17. How do you see the general quality of nurses in Indonesia?
18. What needs to be improved regarding the quality of nurses in Indonesia in your opinion as an employer?
19. **Strategies to attract nurses**
20. How easy or difficult is it for you to attract nurses to work in your institution?
21. What media does your institution use to disseminate nurse job vacancies? Which do you think is the most effective?
22. 18. How many nurses on average apply in one recruitment period? How much did you accept?
23. **Recruitment processes**
24. What are the stages of nurse recruitment in your institution?
25. Who is involved in recruiting nurses?
26. What tools does your institution use to recruit nurses (eg hardcopy sent to the office / email / website / Google form / etc (specify))?
27. How much budget is allocated for the nurse recruitment process?
28. Does your institution have affiliation/cooperation with nursing education institutions to provide nursing staff?
29. **Selection processes**
30. What are the stages of selecting a nurse at your institution?
31. What parameters or indicators are used to select nurses?
32. In the interview (if any) what were asked? Give reasons why these questions were asked!
33. **Deployment**
34. Did the recruited nurse get an explanation of the rights and obligations as an employee?
35. Do recruited nurses receive training before starting work? Mention the type and duration of the training!
